# Supplementary material for: Relationships between test positivity rate, total laboratory confirmed cases of malaria, and malaria incidence in high burden settings of Uganda: an ecological analysissis
Source: Research Square preprint supplement (doi:10.21203/rs.3.rs-65588/v5), 2021-01-18
Supplement: Supplementary file [file 2ce54b27010ef93155992a1c.pdf]

| (1)           | (2) |   |   |  |  |  | (3)  | (4) | (5)       | (6)                           | (7)       | (8)                          | (9)                        |                                                    |                                          | (10)                  | (11)                     | (12)        |          |                  |
|---------------|-----|---|---|--|--|--|------|-----|-----------|-------------------------------|-----------|------------------------------|----------------------------|----------------------------------------------------|------------------------------------------|-----------------------|--------------------------|-------------|----------|------------------|
| SERIAL NUMBER | NIN |   |   |  |  |  | NAME | AGE | SEX (M/F) | CLIENT CATEGORY (WRITE N/R/F) | RESIDENCE | NEXT OF KIN NAME AND CONTACT | NUTRITION ASSESSMENT       |                                                    |                                          | BLOOD PRESSURE (mmHg) | NEED FOR PALLIATIVE CARE | Tobacco Use |          |                  |
|               |     |   |   |  |  |  |      |     |           |                               |           |                              | MUAC (cm + (R-O/R-WO/Y/G)) | BMI(SU/MU/MiU/N/OW/O)<br>BMI FOR AGE (SU/U/N/OW/O) | WEIGHT FOR HEIGHT Z SCORE (R-O/R-WO/Y/G) |                       |                          |             |          |                  |
|               |     |   |   |  |  |  |      |     |           |                               |           |                              | WEIGHT (Kg)                |                                                    | WEIGHT FOR AGE Z SCORE (SU/U/N/OW/O)     | BLOOD SUGAR (mm/l)    |                          |             |          |                  |
|               |     |   |   |  |  |  |      |     |           |                               |           |                              | HEIGHT/ LENGTH (cm)        |                                                    | HEIGHT/ LENGTH FOR AGE Z SCORE (N/S)     |                       |                          |             |          |                  |
|               | N   | I | N |  |  |  |      |     |           |                               |           | SURNAME                      | VILLAGE                    | SURNAME                                            | cm (R-O/R-WO/Y/G)                        | SU/MU/MiU/N/OW/O      | Z-score (R-O/R-WO/Y/G)   | mmHg        | (YES/NO) | TOBACCO USE      |
|               |     |   |   |  |  |  |      | M/F | N/R/F     |                               |           | GIVEN NAME                   | PARISH                     | GIVEN NAME                                         | (SU/U/N/OW/O)                            |                       |                          |             |          | TOBACCO EXPOSURE |
|               |     |   |   |  |  |  |      |     |           |                               |           | PHONE CONTACT                | SUBCOUNTY                  | PHONE CONTACT                                      | Kg                                       | Z-Score (SU/U/N/OW/O) |                          | mm/l        |          | ALCOHOL USE      |
|               |     |   |   |  |  |  |      |     |           |                               |           | PHONE CONTACT                | DISTRICT                   | RELATIONSHIP                                       | cm                                       | N/S                   |                          |             |          |                  |

| (13)           |                          |                      | (14)                   |                               |                             |                           | (15)                |                 | (16)      | (17)         | (18)                                  | (19)             | (20)             |
|----------------|--------------------------|----------------------|------------------------|-------------------------------|-----------------------------|---------------------------|---------------------|-----------------|-----------|--------------|---------------------------------------|------------------|------------------|
| MALARIA TEST   |                          |                      | TB                     |                               |                             |                           | TICK CLASSIFICATION |                 | DIAGNOSIS | PRESCRIPTION | DISABILITY (Write code of disability) | REF. IN (Yes/No) | REF.OUT (Yes/No) |
| FEVER (YES/NO) | TESTS DONE (B/S, RDT/ND) | RESULTS (POS/NEG/NA) | PRESUMED TB CASE (Y/N) | PATIENT SENT TO THE LAB (Y/N) | LAB. TB RESULT (POS/NEG/NA) | LINKED TO TB CLINIC (Y/N) | NEW - ATTENDANCE    | RE - ATTENDANCE |           |              |                                       |                  |                  |
| (YES/NO)       | (B/S, RDT/ND)            | (POS/NEG/NA)         | (Y/N)                  | (Y/N)                         | (POS/NEG/NA)                | (Y/N)                     |                     |                 |           |              |                                       | (Yes/No)         | (Yes/No)         |
|                |                          |                      |                        |                               |                             | Where                     |                     |                 |           |              |                                       |                  |                  |
|                |                          |                      |                        |                               |                             | Unit TB No.               |                     |                 |           |              |                                       |                  |                  |
